# Supplementary material for: Dipeptidyl-Aminopeptidases 8 and 9 Regulate Autophagy and Tamoxifen Response in Breast Cancer Cells
Source: MDPI journal article supplement (doi:10.3390/cells12162031), 2023-08-10
Supplement: s1 [file s1]

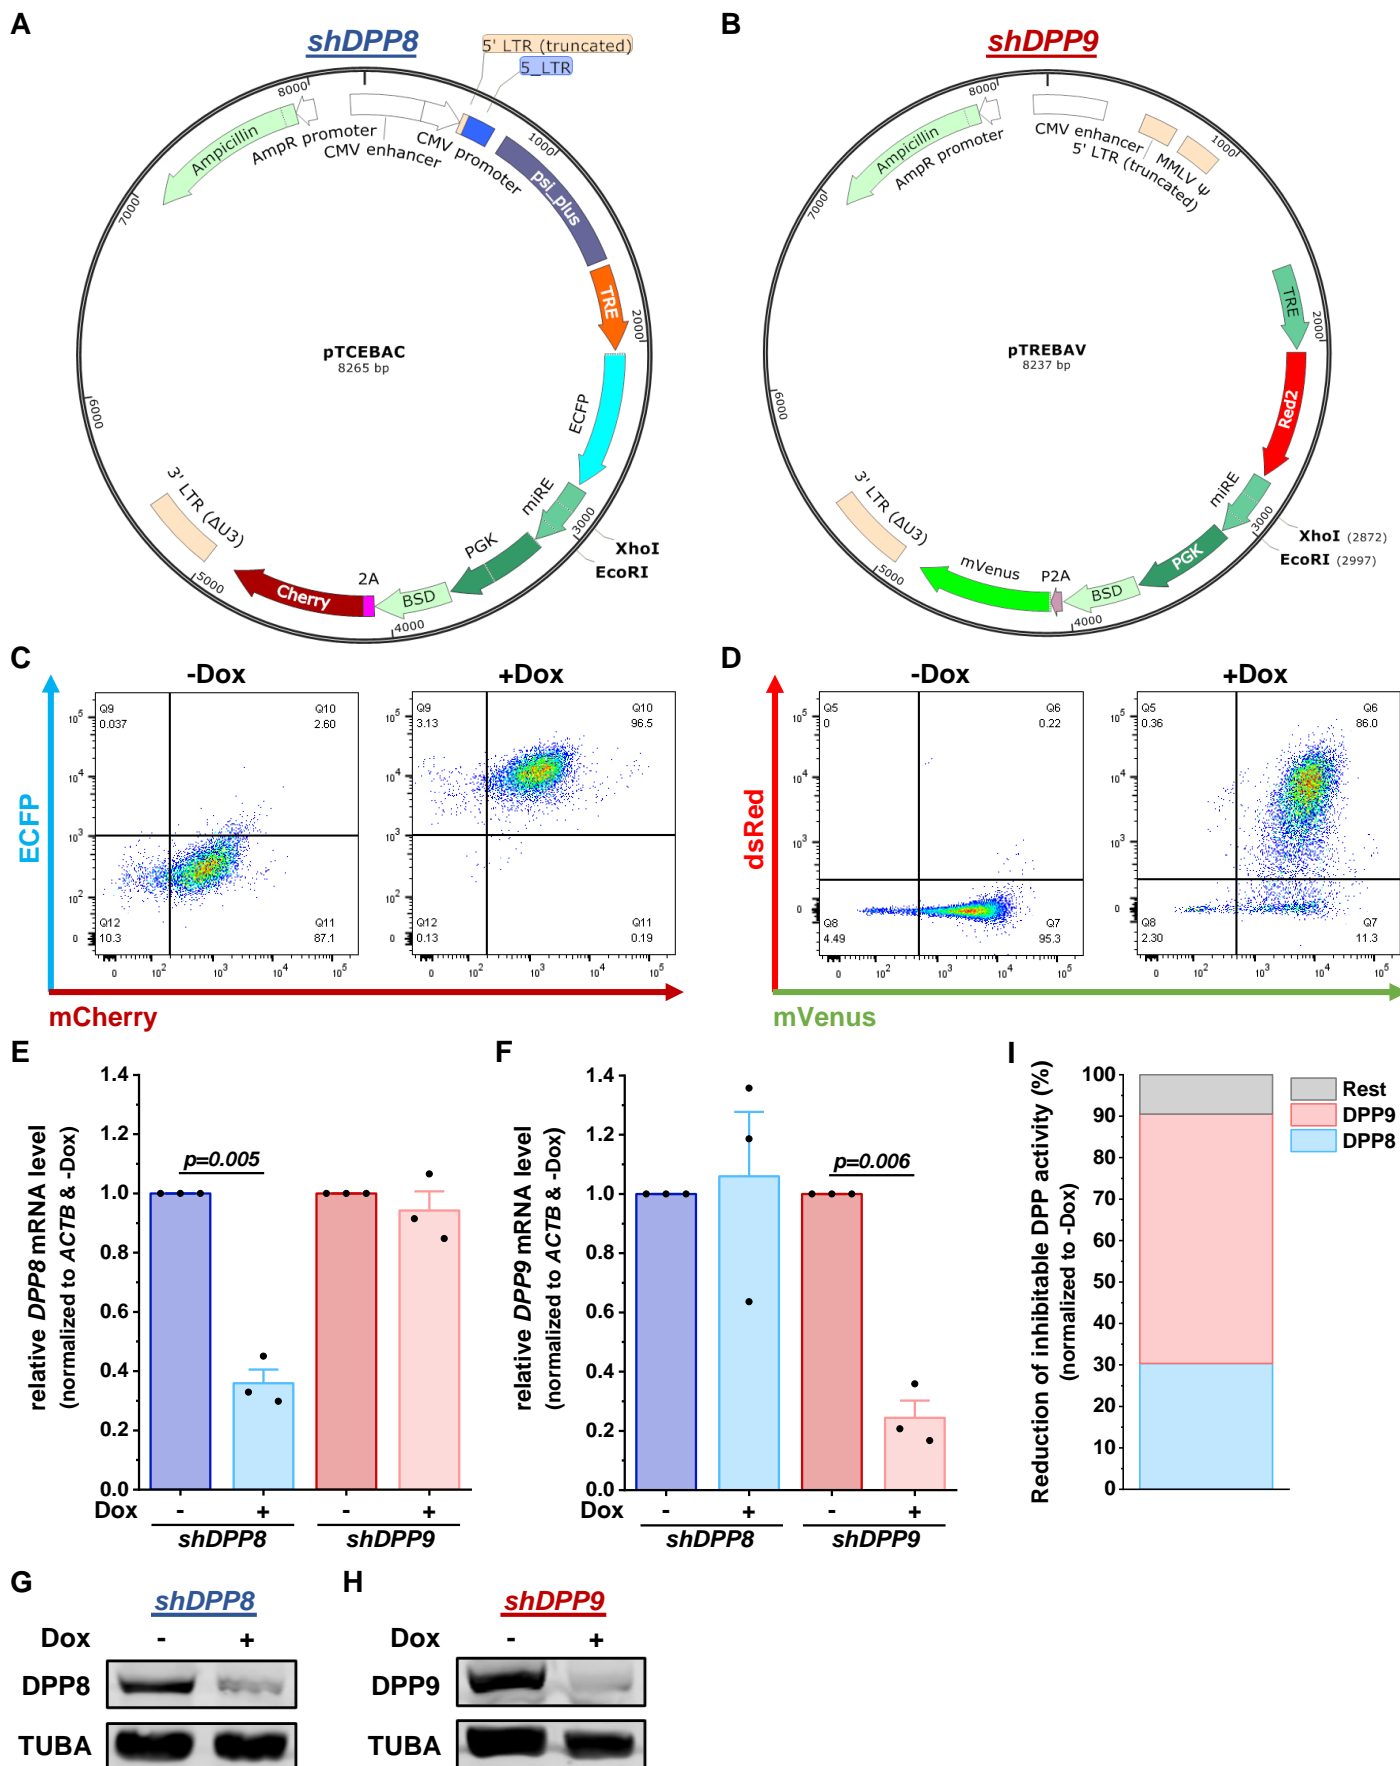

**Figure S1: Validation of DPP8 or DPP9 knockdown in MCF-7 cells.** (A) pTCEBAC with constitutive mCherry and inducible ECFP fluorescence and shDPP8. (B) pTREBAV with constitutive mVenus and inducible dsRed fluorescence and shDPP9. (C-D) FACS of MCF-7 cells  $\pm$  Dox with pTCEBAC + shDPP8 (C) or pTREBAV + shDPP9 (D). (E-F) Relative *DPP8* (E) and *DPP9* (F) mRNA expression normalized to *ACTB*, in *shDPP8*- or *shDPP9*-transduced MCF-7 cells  $\pm$  Dox by qRT-PCR (n=3). (G-H) DPP8 (G) and DPP9 (H) with TUBA protein levels of *shDPP8*- or *shDPP9*-transduced MCF-7 cells  $\pm$  Dox by Western Blot. (I) Relative reduction of inhibitable DPP activity in *shDPP8*- or *shDPP9*-transduced MCF-7 cells (n=3). Bar charts show all data points with mean + SEM and *p*-value calculated by paired-sample *t*-test.

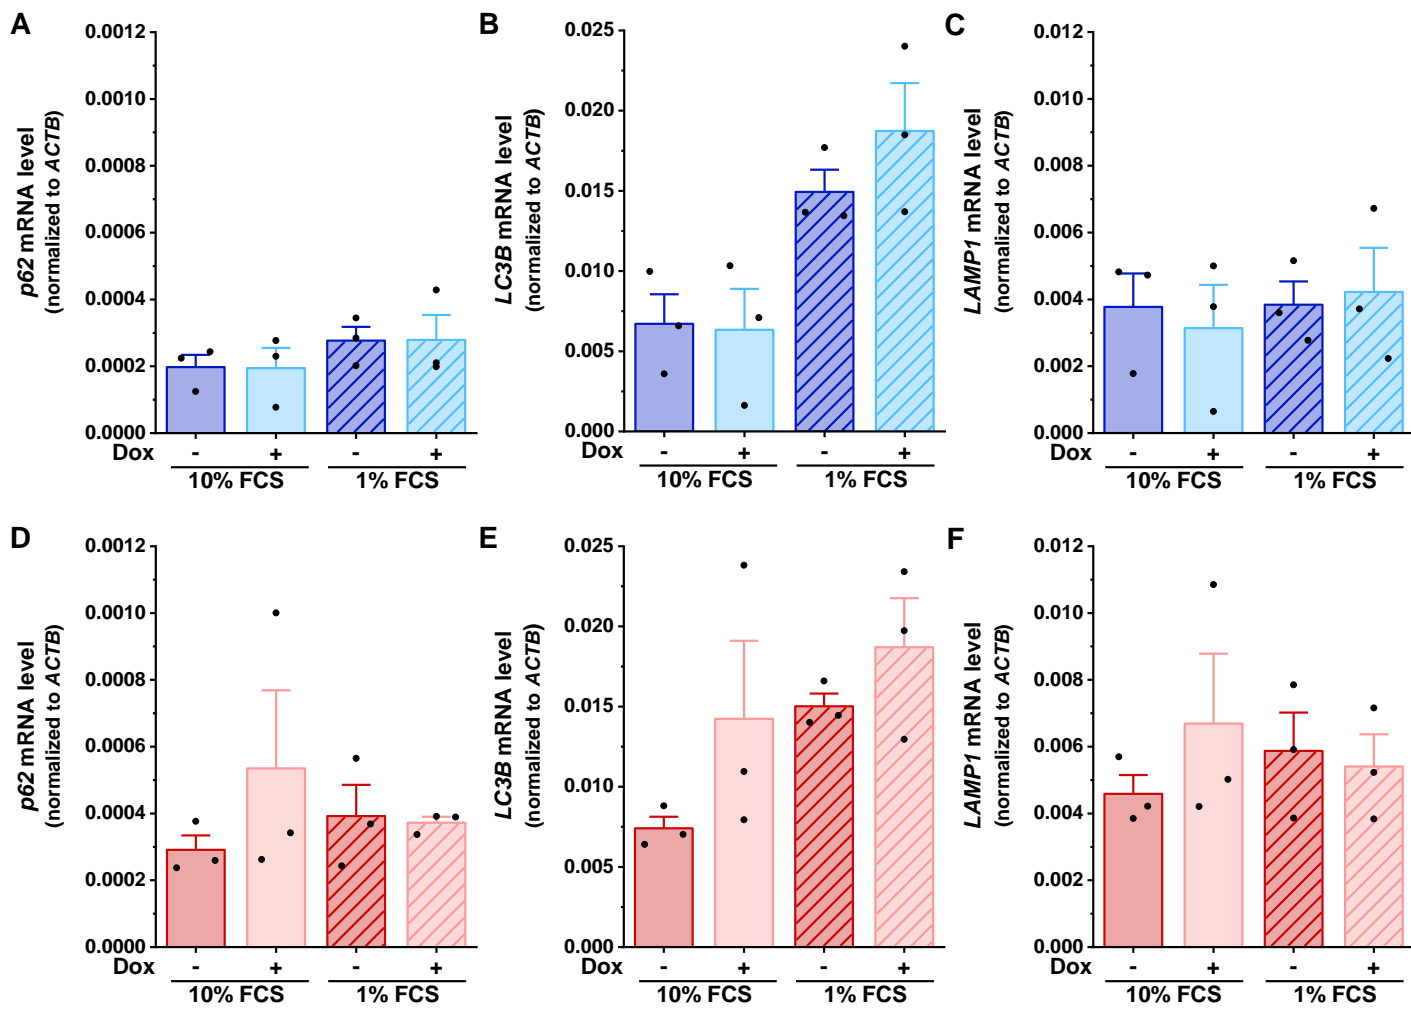

**Figure S2: Expression of autophagosomal and lysosomal marker upon DPP8 or DPP9 knockdown in MCF-7 cells.** (A-C) Relative *p62/SQSTM1* (A), *LC3B* (B), and *LAMP1* (C) mRNA expression normalized to *ACTB* in *shDPP8*-transduced MCF-7 cells  $\pm$  Dox and 10% or 1% FCS by qRT-PCR (n=3). (D-F) Relative *p62/SQSTM1* (D), *LC3B* (E), and *LAMP1* (F) mRNA expression normalized to *ACTB* in *shDPP9*-transduced MCF-7 cells  $\pm$  Dox and 10% or 1% FCS by qRT-PCR (n=3). Bar charts show all data points with mean + SEM.
